# Supplementary material for: Diversity of Lactic Acid Bacteria Involved in the Fermentation of Awa-bancha
Source: PubMed Central journal article supplement (PMC8674441; doi:10.1264/jsme2.me21029), 2021-11-27
Supplement: 36_21029_s1.pdf [file 36_21029_s1.pdf]

Table S1. Number of lactic acid bacteria isolated from Awa-bancha and Ishizuchi-kurocha using MRS agar plates for each producer.

| Types of post-fermented tea                | Awa-bancha | Awa-bancha | Awa-bancha | Awa-bancha | Awa-bancha | Awa-bancha | Awa-bancha | Awa-bancha | Awa-bancha | Awa-bancha | Awa-bancha | Awa-bancha | Ishizuchi-kurocha |
|--------------------------------------------|------------|------------|------------|------------|------------|------------|------------|------------|------------|------------|------------|------------|-------------------|
| Region produced                            | Naka       | Naka       | Naka       | Naka       | Kamikatsu  | Kamikatsu  | Kamikatsu  | Miyoshi    | Miyoshi    | Miyoshi    | Miyoshi    | Miyoshi    | Saijo             |
| Year of produce                            | 2019       | 2019       | 2020       | 2019       | 2019       | 2020       | 2019       | 2019       | 2019       | 2020       | 2020       | 2020       | 2020              |
| Producer                                   | A          | A          | A          | B          | C          | C          | D          | E          | E          | E          | F          | F          | G                 |
| Lot                                        | 1          | 2          | 3          | 1          | 1          | 2          | 1          | 1          | 2          | 3          | 1          | 2          | 1                 |
| <i>Lactiplantibacillus pentosus</i>        | 8          | 8          | 11         | 6          | 12         | 12         | 15         | -          | -          | -          | -          | -          | -                 |
| <i>Lactiplantibacillus plantarum</i>       | -          | -          | 1          | 2          | -          | -          | -          | 16         | 6          | 7          | 7          | 9          | 10                |
| <i>Lactiplantibacillus paraplantarum</i>   | -          | -          | -          | -          | -          | -          | -          | -          | -          | -          | 3          | -          | -                 |
| <i>Secundilactobacillus collinoides</i>    | 3          | 3          | -          | -          | -          | -          | -          | -          | -          | 1          | -          | -          | -                 |
| <i>Lacticaseibacillus pantheris</i>        | -          | 3          | -          | -          | -          | -          | -          | -          | -          | -          | -          | -          | -                 |
| <i>Loigolactobacillus coryniformis</i>     | -          | 1          | -          | -          | -          | -          | -          | -          | -          | 3          | -          | 2          | -                 |
| <i>Levilactobacillus brevis</i>            | -          | -          | -          | -          | -          | -          | -          | 3          | 1          | -          | -          | -          | 2                 |
| <i>Lactiplantibacillus mudanjiangensis</i> | -          | -          | -          | -          | -          | -          | -          | -          | 1          | -          | -          | -          | -                 |
| <i>Leuconostoc mesenteroides</i>           | -          | -          | -          | -          | -          | -          | -          | 2          | -          | -          | -          | -          | -                 |
| Total isolates                             | 11         | 15         | 12         | 8          | 12         | 12         | 15         | 21         | 8          | 11         | 10         | 11         | 12                |

- : Not isolated

Table S2. Lactic acid bacteria used in the phylogenetic analysis of the *dnaK* gene.

| Strain                   | Species                                  | DDBJ Accession No. | Isolation           |           |      |          |     |
|--------------------------|------------------------------------------|--------------------|---------------------|-----------|------|----------|-----|
|                          |                                          |                    | Source              | Region    | Year | Producer | Lot |
| NBRC 106467 <sup>T</sup> | <i>Lactiplantibacillus pentosus</i>      | LC625743           | Corn silage         |           |      |          |     |
| NBRC 12011               | <i>Lactiplantibacillus pentosus</i>      | LC625744           |                     |           |      |          |     |
| NBRC 15891 <sup>T</sup>  | <i>Lactiplantibacillus plantarum</i>     | LC625745           | Pickled cabbage     |           |      |          |     |
| NBRC 107151 <sup>T</sup> | <i>Lactiplantibacillus paraplantarum</i> | LC625770           | Beer spoilage agent |           |      |          |     |
| A1915                    | <i>Lactiplantibacillus pentosus</i>      | LC625746           | Awa-bancha          | Naka      | 2019 | A        | 1   |
| A1922                    | <i>Lactiplantibacillus pentosus</i>      | LC625747           | Awa-bancha          | Naka      | 2019 | A        | 2   |
| A2009                    | <i>Lactiplantibacillus pentosus</i>      | LC625748           | Awa-bancha          | Naka      | 2020 | A        | 3   |
| A2011                    | <i>Lactiplantibacillus pentosus</i>      | LC625749           | Awa-bancha          | Naka      | 2020 | A        | 3   |
| B1901                    | <i>Lactiplantibacillus pentosus</i>      | LC625750           | Awa-bancha          | Naka      | 2019 | B        | 1   |
| B1907                    | <i>Lactiplantibacillus plantarum</i>     | LC625751           | Awa-bancha          | Naka      | 2019 | B        | 1   |
| B1910                    | <i>Lactiplantibacillus plantarum</i>     | LC625752           | Awa-bancha          | Naka      | 2019 | B        | 1   |
| B1911                    | <i>Lactiplantibacillus pentosus</i>      | LC625753           | Awa-bancha          | Naka      | 2019 | B        | 1   |
| C1915                    | <i>Lactiplantibacillus pentosus</i>      | LC625754           | Awa-bancha          | Kamikatsu | 2019 | C        | 1   |
| C1925                    | <i>Lactiplantibacillus pentosus</i>      | LC625755           | Awa-bancha          | Kamikatsu | 2019 | C        | 1   |
| C2001                    | <i>Lactiplantibacillus pentosus</i>      | LC625756           | Awa-bancha          | Kamikatsu | 2020 | C        | 2   |
| C2010                    | <i>Lactiplantibacillus pentosus</i>      | LC625757           | Awa-bancha          | Kamikatsu | 2020 | C        | 2   |
| D1902                    | <i>Lactiplantibacillus pentosus</i>      | LC625758           | Awa-bancha          | Kamikatsu | 2019 | D        | 1   |
| D1915                    | <i>Lactiplantibacillus pentosus</i>      | LC625759           | Awa-bancha          | Kamikatsu | 2019 | D        | 1   |
| E1901                    | <i>Lactiplantibacillus plantarum</i>     | LC625760           | Awa-bancha          | Miyoshi   | 2019 | E        | 1   |
| E1922                    | <i>Lactiplantibacillus plantarum</i>     | LC625761           | Awa-bancha          | Miyoshi   | 2019 | E        | 2   |
| E2001                    | <i>Lactiplantibacillus plantarum</i>     | LC625762           | Awa-bancha          | Miyoshi   | 2020 | E        | 3   |
| E2011                    | <i>Lactiplantibacillus plantarum</i>     | LC625763           | Awa-bancha          | Miyoshi   | 2020 | E        | 3   |
| F2001                    | <i>Lactiplantibacillus paraplantarum</i> | LC625764           | Awa-bancha          | Miyoshi   | 2020 | F        | 1   |
| F2002                    | <i>Lactiplantibacillus plantarum</i>     | LC625765           | Awa-bancha          | Miyoshi   | 2020 | F        | 1   |
| F2006                    | <i>Lactiplantibacillus paraplantarum</i> | LC625766           | Awa-bancha          | Miyoshi   | 2020 | F        | 1   |
| F2015                    | <i>Lactiplantibacillus plantarum</i>     | LC625767           | Awa-bancha          | Miyoshi   | 2020 | F        | 2   |
| G2001                    | <i>Lactiplantibacillus plantarum</i>     | LC625768           | Ishizuchi-kurocha   | Saijo     | 2020 | G        | 1   |
| G2010                    | <i>Lactiplantibacillus plantarum</i>     | LC625769           | Ishizuchi-kurocha   | Saijo     | 2020 | G        | 1   |
